# Supplementary material
Source: PubMed Central journal article supplement (PMC3248492)
Supplement: 1110840108_Appendix.pdf [file 1110840108_Appendix.pdf]

## Supporting Information

### Kim et al. 'Protein Dynamical Transition at 110 K'

#### 1. Sample information

In this study, X-ray diffraction data sets from 6 Thaumatin crystals were used (5 crystals for the main text, 1 additional crystal for Supporting Information). Information on each crystal is as follows.

- 1) **Thau-0M-1**: Equilibrated to de-ionized water, pressure cryocooled at 200 MPa.
- 2) **Thau-0M-2**: Equilibrated to de-ionized water, pressure cryocooled at 200 MPa.
- 3) **Thau-0.45M**: Equilibrated to 0.45 M Sodium Potassium tartrate solution, pressure cryocooled at 200 MPa.
- 4) **Thau-0.9M**: Equilibrated to 0.9 M Sodium Potassium tartrate solution, pressure cryocooled at 200 MPa.
- 5) **Thau-control**: Equilibrated to 0.9 M Sodium Potassium tartrate solution, cryoprotected with 20 % glycerol (v/v), cryocooled at 0.1 MPa.
- 6) **Thau-control-noGLY**: Equilibrated to 1.5 M Sodium Potassium tartrate solution, no glycerol added, cryocooled at 0.1 MPa.

X-ray diffraction data collection and refinement statistics for each crystal can be found in Table S1-S12 at the end.

#### 2. Interpretation of the B-factor and the self-RMS deviation profiles

The protein dynamical transition has been studied by monitoring the mean square atomic displacement ( $\langle x^2 \rangle$ ) of protein atoms. In X-ray protein crystallography, the atomic displacement consists of three major terms (1).

$$\langle x^2 \rangle_{\text{total}} = \langle x^2 \rangle_{\text{lattice}} + \langle x^2 \rangle_{\text{vib}} + \langle x^2 \rangle_{\text{conf}}$$

The first term ( $\langle x^2 \rangle_{\text{lattice}}$ ) is the contribution due to lattice disorder. It is a static disorder and typically does not change at cryogenic temperatures if a protein crystal is cryocooled at ambient pressure. However, it was observed that crystal lattice disorder can be changing during crystal warming when the crystal is cryocooled at high pressure(2). The changes in the crystal lattice disorder can be monitored by crystal mosaicity.

The second term ( $\langle x^2 \rangle_{\text{vib}}$ ) is the contribution due to atomic vibrational motions and is linearly increasing when temperature increases both in the high pressure cryocooled and ambient pressure cryocooled protein crystals. The third term ( $\langle x^2 \rangle_{\text{conf}}$ ) is the contribution due to the protein conformational fluctuations and reflects either the static distributions of conformational states or the dynamical motions between conformational states. Although the X-ray diffraction measurement cannot distinguish the difference between the static distribution and the dynamical motions, the temperature dependence of the third term provides the clues for the dynamical fluctuations. The nonlinear increase in the third term indicates that protein conformational fluctuations are enabled at least transiently while temperature increases.

In our study, it was observed that the B-factor profiles and the self-RMS deviation profiles from high pressure cryocooled crystals show nonlinear behavior upon warming. The crystal mosaicity profiles of high pressure cryocooled crystals (section 4 in this supporting information) indicate that the crystal lattice disorder is not a major term for the nonlinearity. As lattice disorder and atomic vibrational motions do not account for this nonlinear behavior, we concluded that the experimental results (Fig 1, Fig 2) reflect the gained dynamical fluctuations during the HDA-LDA phase transition. Our interpretation is following.

When a protein molecule is trapped in LDA ice (Thau-control), large conformational fluctuations are frozen out. Therefore, only a small linear increase in the B-factor and self-RMS deviation profiles is observed when temperature increases.

On the other hand, during the HDA to LDA ice transition, protein molecules are possibly exposed to a transient fluid environment, allowing large conformational fluctuations(2). When the transition is completed, further dynamical motions of the protein molecules may be again frozen. But this frozen state represents the final, higher temperature distribution of the conformational states right before being refrozen. This can cause a rapid increase in the B-factor and the self-RMS deviation profiles, showing nonlinearity.

It is important to note that the B-factor and the self-RMS deviation values of a cryocooled protein are not fully determined by the final ice state because there is no guarantee that the state that is frozen is in full thermal equilibrium. The approach to thermal equilibrium may be path dependent. The final conformational states of a protein after the HDA-LDA transition at a given temperature can be different from the states of a protein trapped in the LDA ice. This can explain the observed higher B-factor and self-RMS deviation values for the high-pressure cryocooled protein crystals after HDA-LDA transition (table S1-S12) compared to proteins which were warmed to the same temperature, but have been trapped in LDA ice throughout the warming process.

Note that the absolute B-factor values (table S1-S12) of a protein depend on the initial crystal quality and the way that the protein crystal is handled before X-ray diffraction measurement. Therefore, directly comparing the absolute B factor values between different crystals can be misleading. The protein dynamical transition is detected by the nonlinear changes in the B-factor profiles, which does not require the absolute values. For this reason, the initial B factor values of different thaumatin crystals are normalized to be 10 at 80 K in Fig. 1C in the main article.

### **3. Changes in crystal lattice disorder during protein dynamical transition**

Crystal mosaicity is a measure of disorder in unit-cell alignment and reflects the lattice disorder in a protein crystal. Fig. S1A shows the crystal mosaicity profiles of 4 high pressure cryocooled crystals (Thau-0M-1, Thau-0M-2, Thau-0.45M, and Thau-0.9M) and 1 ambient pressure cryocooled crystal (Thau-control). The mosaicity profiles of high pressure cryocooled crystals show significant fluctuations compared to the profile from

Thau-control. Note that the crystal mosaicity of high-pressure cryocooled crystals show improvement (between 110 K and 140 K for Thau-0M-2/Thau-0.45M/Thau-0.9M, and between 125 K and 142 K for Thau-0M-1), indicating that the crystal lattice disorder actually decreased over the temperature range. This observation supports that the observed nonlinear behaviors in the B-factor profiles and the self-RMS profiles (Figure 1C and Figure 2 in the main text) are the consequence of the protein conformational fluctuations rather than the increased lattice disorder. Fig. S1B shows that the improvement in the crystal mosaicity above 126 K affects the B-factor profile of the high pressure cryocooled crystal, suggesting that the B-factor profile of a high pressure cryocooled crystal not only represents the protein conformational fluctuations but also the changes in the crystal lattice disorder. Note that the B-factor profile still rises above 126 K when the crystal mosaicity improves (i.e. lattice disorder decreases). This indicates that the B-factor profile mainly reflects the protein dynamical fluctuations rather than the crystal lattice disorder.

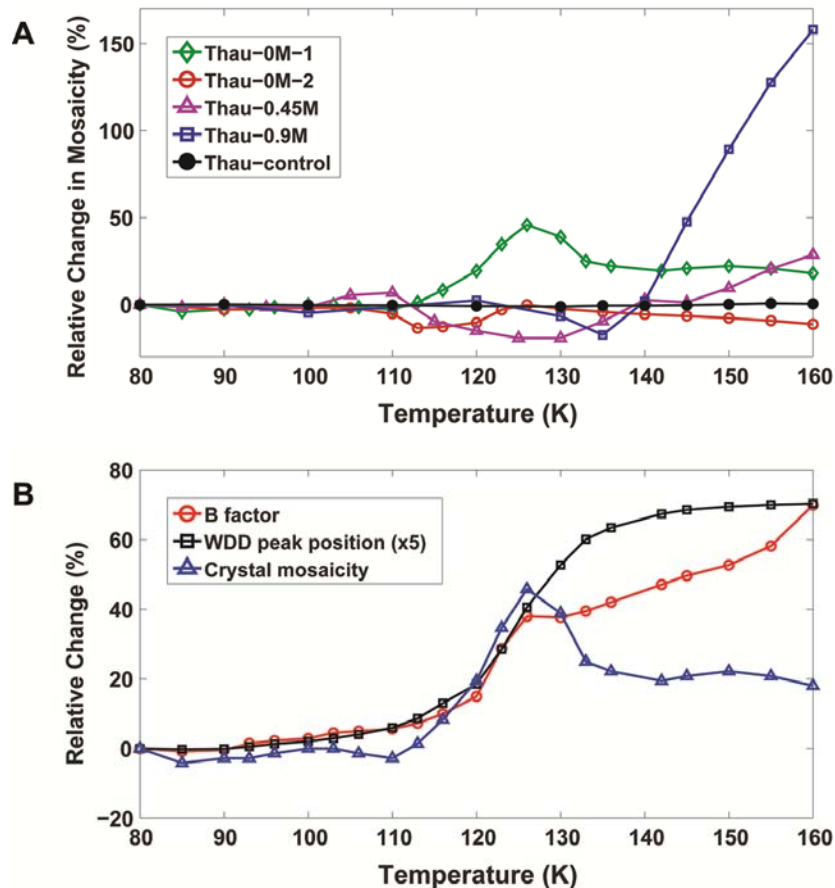

**Fig. S1** Crystal mosaicity profiles of cryocooled crystals (Thau-0M-1, Thau-0M-2, Thau-0.45M, Thau-0.9M, and Thau-control) from 80 K to 160 K. (A) The high pressure cryocooled crystals show significant fluctuations in the temperature range, indicating some changes in the crystal lattice disorder via molecular rearrangement. In contrast, the ambient pressure cryocooled crystal (Thau-control) shows little fluctuations. (B) Superposition of crystal mosaicity with B factor and WDD primary peak position profiles of Thau-0M-1. Note that the B factor profile shows some deviation from the WDD peak position profile right above 126 K where the crystal mosaicity begins to fall down.

#### **4. Effects of glycerol on cryogenic protein dynamical transition**

The 4 high pressure cryocooled crystals (Thau-0M-1, Thau-0M-2, Thau-0.45M, Thau-0.9M) were cryocooled without adding glycerol. However, high quality X-ray diffraction data sets could be collected because cryocooling of protein crystals under high pressure eliminates the need for chemical cryoprotectants(3). In contrast, the ambient pressure cryocooled crystal (Thau-control) was soaked into 20 % glycerol (v/v) containing solution before cryocooling for crystal cryoprotection. To see the effect of glycerol on the protein dynamical transition at cryogenic temperature, additional Thaumatin crystal (Thau-control-noGLY) was cryocooled at ambient pressure without adding glycerol. The B factor profiles of Thau-control and Thau-control-noGLY in Fig. S2 show no features of protein dynamical transition at cryogenic temperatures, therefore eliminating the possibility that the absence of glycerol in the high pressure cryocooled crystals is the cause for the protein dynamical transition. Note that the X-ray diffraction quality of Thau-control-noGLY as shown in Table S11 is poorer (in terms of crystal mosaicity,  $R_{\text{sym}}$ , and  $I/\sigma(I)$ ) than Thau-control (Table S9) as a consequence of crystal damage during cryocooling at ambient pressure without chemical cryoprotectants.

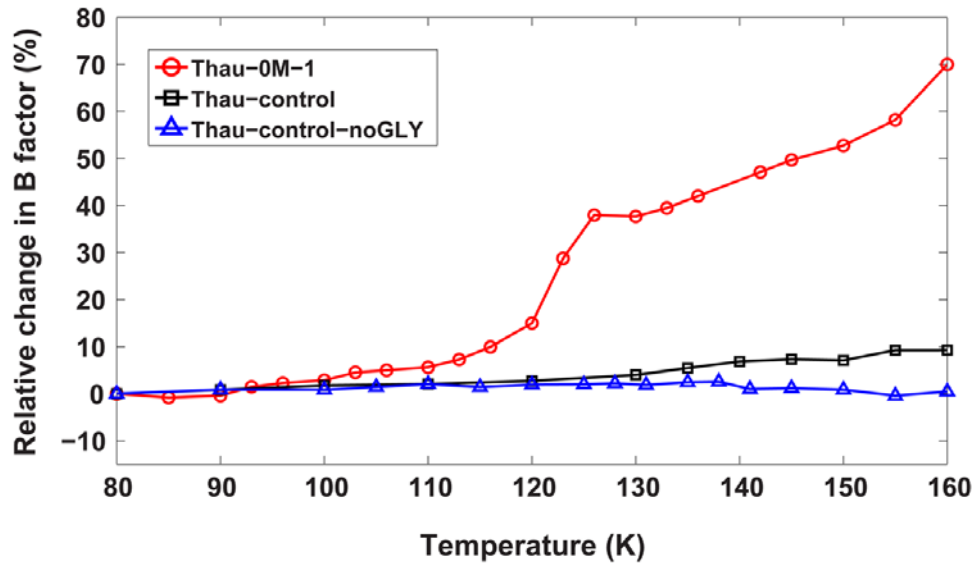

**Fig. S2** The B factor profiles of Thau-control and Thau-control-noGLY along with the profile of Thau-0M-1 as a reference. The Thau-0M-1 profile shows nonlinearity above 110 K, indicative of protein dynamical transition. In contrast, no clear nonlinearity is observed from Thau-control and Thau-control-noGLY. This result suggests that the absence of glycerol in the high pressure cryocooled crystal is not responsible for the observed protein dynamical transition.

## Reference

1. Ringe D, Petsko GA (1986) Study of protein dynamics by x-ray diffraction. *Methods Enzymol* 131:389-433.
2. Kim CU, Barstow B, Tate MW, Gruner SM (2009) Evidence for liquid water during the high-density to low-density amorphous ice transition. *Proc Natl Acad Sci USA* 106:4596-4600.
3. Kim CU, Kapfer R, Gruner SM (2005) High pressure cooling of protein crystals without cryoprotectants. *Acta Crystallogr D* 61:881-890.

**Table S1.** Data collection statistics of Thau-0M-1

| Temp (K) | Unit-cell dimensions (Å) |        | Resolution (Å)       | Mosaicity (°) | R <sub>sym</sub> <sup>a</sup> | I/σ(I)         | Completeness (%) | Redundancy |
|----------|--------------------------|--------|----------------------|---------------|-------------------------------|----------------|------------------|------------|
|          | a=b                      | c      |                      |               |                               |                |                  |            |
| 80       | 57.36                    | 149.02 | 30-2.0<br>(2.03-2.0) | 0.360         | 0.053<br>(0.081)              | 36.2<br>(17.1) | 99.4 (99.8)      | 6.9 (5.6)  |
| 85       | 57.37                    | 149.06 | 30-2.0<br>(2.03-2.0) | 0.345         | 0.045<br>(0.076)              | 41.4<br>(18.3) | 99.3 (99.8)      | 6.9 (5.6)  |
| 90       | 57.39                    | 149.11 | 30-2.0<br>(2.03-2.0) | 0.350         | 0.049<br>(0.079)              | 37.9<br>(17.4) | 99.3 (99.9)      | 6.9 (5.6)  |
| 93       | 57.41                    | 149.15 | 30-2.0<br>(2.03-2.0) | 0.350         | 0.047<br>(0.078)              | 40.3<br>(18.1) | 99.3 (99.9)      | 6.9 (5.6)  |
| 96       | 57.43                    | 149.18 | 30-2.0<br>(2.03-2.0) | 0.355         | 0.046<br>(0.077)              | 41.1<br>(18.0) | 99.3 (99.9)      | 6.9 (5.6)  |
| 100      | 57.45                    | 149.24 | 30-2.0<br>(2.03-2.0) | 0.360         | 0.046<br>(0.079)              | 41.7<br>(18.3) | 99.3 (99.9)      | 6.9 (5.6)  |
| 103      | 57.47                    | 149.29 | 30-2.0<br>(2.03-2.0) | 0.360         | 0.045<br>(0.077)              | 41.3<br>(18.2) | 99.3 (99.9)      | 6.9 (5.6)  |
| 106      | 57.50                    | 149.36 | 30-2.0<br>(2.03-2.0) | 0.355         | 0.046<br>(0.082)              | 41.7<br>(17.6) | 99.3 (100)       | 6.9 (5.6)  |
| 110      | 57.54                    | 149.46 | 30-2.0<br>(2.03-2.0) | 0.350         | 0.046<br>(0.082)              | 41.4<br>(17.5) | 99.3 (99.9)      | 6.9 (5.6)  |
| 113      | 57.59                    | 149.56 | 30-2.0<br>(2.03-2.0) | 0.365         | 0.046<br>(0.084)              | 40.1<br>(16.5) | 99.3 (99.9)      | 6.9 (5.6)  |
| 116      | 57.65                    | 149.68 | 30-2.0<br>(2.03-2.0) | 0.390         | 0.047<br>(0.086)              | 39.9<br>(15.6) | 99.3 (99.7)      | 6.9 (5.5)  |
| 120      | 57.74                    | 149.87 | 30-2.0<br>(2.03-2.0) | 0.430         | 0.049<br>(0.098)              | 39.2<br>(14.6) | 99.2 (99.8)      | 6.9 (5.7)  |
| 123      | 57.86                    | 150.12 | 30-2.0<br>(2.03-2.0) | 0.485         | 0.051<br>(0.111)              | 37.1<br>(12.8) | 99.2 (99.9)      | 6.9 (5.7)  |
| 126      | 58.05                    | 150.41 | 30-2.0<br>(2.03-2.0) | 0.525         | 0.053<br>(0.120)              | 36.2<br>(11.3) | 99.2 (99.9)      | 6.9 (5.8)  |
| 130      | 58.26                    | 150.73 | 30-2.0<br>(2.03-2.0) | 0.500         | 0.053<br>(0.119)              | 34.9<br>(12.4) | 99.1 (98.5)      | 6.9 (5.9)  |
| 133      | 58.39                    | 150.93 | 30-2.0<br>(2.03-2.0) | 0.450         | 0.050<br>(0.108)              | 37.6<br>(13.9) | 99.1 (98.4)      | 7.0 (5.8)  |
| 136      | 58.46                    | 150.98 | 30-2.0<br>(2.03-2.0) | 0.440         | 0.050<br>(0.108)              | 37.3<br>(12.9) | 99.1 (98.9)      | 6.9 (5.7)  |
| 142      | 58.56                    | 151.03 | 30-2.0<br>(2.03-2.0) | 0.430         | 0.051<br>(0.111)              | 37.5<br>(12.7) | 99.1 (99.1)      | 7.0 (5.7)  |
| 145      | 58.61                    | 151.03 | 30-2.0<br>(2.03-2.0) | 0.435         | 0.051<br>(0.118)              | 35.8<br>(11.6) | 99.1 (99.4)      | 7.0 (5.6)  |
| 150      | 58.66                    | 151.03 | 30-2.0<br>(2.03-2.0) | 0.440         | 0.052<br>(0.122)              | 36.6<br>(11.6) | 99.1 (99.6)      | 6.9 (5.6)  |
| 155      | 58.72                    | 151.02 | 30-2.0<br>(2.03-2.0) | 0.435         | 0.053<br>(0.129)              | 36.6<br>(10.7) | 99.1 (99.6)      | 7.0 (5.6)  |
| 160      | 58.78                    | 151.01 | 30-2.0<br>(2.03-2.0) | 0.425         | 0.052<br>(0.123)              | 36.9<br>(11.0) | 99.1 (99.6)      | 6.9 (5.6)  |

$$^a R_{\text{sym}} = \frac{\sum |I - \langle I \rangle|}{\sum \langle I \rangle}$$

**Table S2.** Refinement statistics of Thau-0M-1

| Temp (K) | Unique reflections | R factor <sup>a</sup> | R <sub>free</sub> factor <sup>b</sup> | B factor (Å <sup>2</sup> ) – main chain | Self-RMS deviation <sup>c</sup> (Å) | WDD peak position (Å) <sup>d</sup> |
|----------|--------------------|-----------------------|---------------------------------------|-----------------------------------------|-------------------------------------|------------------------------------|
| 80       | 17513              | 0.166                 | 0.225                                 | 9.24                                    | 0                                   | 3.26                               |
| 85       | 17532              | 0.167                 | 0.221                                 | 9.16                                    | 0.046                               | 3.26                               |
| 90       | 17549              | 0.165                 | 0.222                                 | 9.20                                    | 0.044                               | 3.26                               |
| 93       | 17571              | 0.165                 | 0.217                                 | 9.37                                    | 0.05                                | 3.27                               |
| 96       | 17578              | 0.170                 | 0.228                                 | 9.45                                    | 0.053                               | 3.27                               |
| 100      | 17598              | 0.162                 | 0.232                                 | 9.50                                    | 0.047                               | 3.28                               |
| 103      | 17606              | 0.167                 | 0.240                                 | 9.65                                    | 0.053                               | 3.28                               |
| 106      | 17621              | 0.164                 | 0.227                                 | 9.70                                    | 0.056                               | 3.29                               |
| 110      | 17659              | 0.169                 | 0.248                                 | 9.76                                    | 0.067                               | 3.30                               |
| 113      | 17685              | 0.165                 | 0.243                                 | 9.91                                    | 0.068                               | 3.32                               |
| 116      | 17883              | 0.166                 | 0.234                                 | 10.16                                   | 0.080                               | 3.35                               |
| 120      | 17789              | 0.167                 | 0.235                                 | 10.62                                   | 0.094                               | 3.39                               |
| 123      | 17860              | 0.168                 | 0.231                                 | 11.89                                   | 0.118                               | 3.45                               |
| 126      | 17980              | 0.168                 | 0.230                                 | 12.75                                   | 0.147                               | 3.53                               |
| 130      | 18118              | 0.168                 | 0.224                                 | 12.72                                   | 0.174                               | 3.61                               |
| 133      | 18260              | 0.169                 | 0.224                                 | 12.88                                   | 0.197                               | 3.66                               |
| 136      | 18319              | 0.167                 | 0.227                                 | 13.12                                   | 0.207                               | 3.68                               |
| 142      | 18384              | 0.167                 | 0.224                                 | 13.59                                   | 0.217                               | 3.70                               |
| 145      | 18415              | 0.168                 | 0.219                                 | 13.83                                   | 0.219                               | 3.71                               |
| 150      | 18445              | 0.169                 | 0.216                                 | 14.11                                   | 0.228                               | 3.72                               |
| 155      | 18494              | 0.173                 | 0.217                                 | 14.61                                   | 0.232                               | 3.72                               |
| 160      | 18521              | 0.169                 | 0.214                                 | 15.70                                   | 0.235                               | 3.72                               |

<sup>a</sup> R factor =  $\sum |F_o| - |F_c| / \sum |F_{obs}|$

<sup>b</sup> R<sub>free</sub> factor is calculated the same as R factor, except it uses 5 % of reflection data omitted from refinement

<sup>c</sup> Self-RMS deviation was calculated between the structure at 80 K and the structures at higher temperatures of Thau-0M-1.

<sup>d</sup> WDD peak position in d-spacing:  $d = 2\pi/Q$ , where the momentum transfer vector  $Q$  is given by  $Q = 4\pi\sin(\theta)/\lambda$ , where  $\lambda$  is the X-ray wavelength and  $2\theta$  is the angle between the incident beam and the diffracted X-rays.



**Table S3.** Data collection statistics of Thau-0M-2

| Temp (K) | Unit-cell dimensions (Å) |        | Resolution (Å)        | Mosaicity (°) | R <sub>sym</sub> <sup>a</sup> | I/σ(I)     | Completeness (%) | Redundancy |
|----------|--------------------------|--------|-----------------------|---------------|-------------------------------|------------|------------------|------------|
|          | a=b                      | c      |                       |               |                               |            |                  |            |
| 80       | 57.58                    | 149.94 | 50-1.8<br>(1.83-1.8)  | 0.53          | 0.047<br>(0.120)              | 28.1 (8.2) | 96.4 (93.4)      | 4.0 (3.7)  |
| 90       | 57.59                    | 149.99 | 50-1.8<br>(1.83-1.8)  | 0.515         | 0.046<br>(0.119)              | 28.6 (8.5) | 96.4 (93.3)      | 4.0 (3.7)  |
| 100      | 57.63                    | 150.09 | 50-1.8<br>(1.83-1.8)  | 0.521         | 0.047<br>(0.119)              | 28.7 (8.3) | 96.3 (93.2)      | 4.0 (3.7)  |
| 105      | 57.68                    | 150.18 | 50-1.8<br>(1.83-1.8)  | 0.521         | 0.046<br>(0.125)              | 28.3 (8.2) | 96.2 (92.7)      | 4.0 (3.7)  |
| 110      | 57.74                    | 150.20 | 50-1.8<br>(1.83-1.8)  | 0.503         | 0.048<br>(0.126)              | 28.8 (8.3) | 96.1 (92.4)      | 4.0 (3.7)  |
| 113      | 57.78                    | 150.26 | 50-1.8<br>(1.83-1.8)  | 0.459         | 0.047<br>(0.121)              | 29.3 (8.6) | 96.1 (92.3)      | 4.0 (3.7)  |
| 116      | 57.84                    | 150.38 | 50-1.8<br>(1.83-1.8)  | 0.463         | 0.048<br>(0.122)              | 29.1 (8.4) | 96.1 (92.1)      | 4.0 (3.7)  |
| 120      | 57.93                    | 150.54 | 50-1.8<br>(1.83-1.8)  | 0.476         | 0.048<br>(0.126)              | 28.4 (8.2) | 96.0 (92.5)      | 4.0 (3.7)  |
| 123      | 58.07                    | 150.79 | 50-1.8<br>(1.83-1.8)  | 0.515         | 0.050<br>(0.139)              | 26.4 (7.2) | 95.9 (92.5)      | 4.0 (3.7)  |
| 126      | 58.24                    | 151.08 | 50-1.8<br>(1.83-1.8)  | 0.53          | 0.053<br>(0.163)              | 25.1 (6.0) | 95.8 (92.8)      | 4.0 (3.7)  |
| 130      | 58.47                    | 151.46 | 50-1.8<br>(1.83-1.8)  | 0.518         | 0.055<br>(0.171)              | 24.9 (5.5) | 92.4 (93.1)      | 4.1 (3.7)  |
| 135      | 58.65                    | 151.67 | 530-1.8<br>(1.83-1.8) | 0.508         | 0.053<br>(0.184)              | 26.4 (5.5) | 90.6 (92.1)      | 4.2 (3.7)  |
| 140      | 58.76                    | 151.74 | 50-1.8<br>(1.83-1.8)  | 0.501         | 0.053<br>(0.201)              | 25.9 (5.2) | 89.9 (92.1)      | 4.3 (3.7)  |
| 145      | 58.84                    | 151.73 | 50-1.8<br>(1.83-1.8)  | 0.496         | 0.054<br>(0.208)              | 26.4 (4.8) | 89.6 (91.9)      | 4.3 (3.7)  |
| 150      | 58.90                    | 151.70 | 50-1.8<br>(1.83-1.8)  | 0.490         | 0.053<br>(0.220)              | 26.1 (4.7) | 89.4 (91.7)      | 4.3 (3.7)  |
| 155      | 58.95                    | 151.66 | 50-1.8<br>(1.83-1.8)  | 0.481         | 0.054<br>(0.226)              | 25.8 (4.2) | 89.3 (91.6)      | 4.3 (3.7)  |
| 160      | 58.99                    | 151.61 | 50-1.8<br>(1.83-1.8)  | 0.471         | 0.055<br>(0.247)              | 25.5 (4.0) | 89.2 (91.4)      | 4.3 (3.8)  |

$$^a R_{\text{sym}} = \sum |I - \langle I \rangle| / \sum \langle I \rangle$$

**Table S4.** Refinement statistics of Thau-0M-2

| Temp (K) | Unique reflections | R factor <sup>a</sup> | R <sub>free</sub> factor <sup>b</sup> | B factor (Å <sup>2</sup> )<br>– main chain | Self-RMS deviation <sup>c</sup><br>(Å) | WDD peak position (Å)<br><sup>d</sup> |
|----------|--------------------|-----------------------|---------------------------------------|--------------------------------------------|----------------------------------------|---------------------------------------|
| 80       | 23420              | 0.159                 | 0.216                                 | 8.34                                       | 0                                      | 3.27                                  |
| 90       | 23416              | 0.160                 | 0.216                                 | 8.55                                       | 0.037                                  | 3.27                                  |
| 100      | 23439              | 0.162                 | 0.211                                 | 8.52                                       | 0.043                                  | 3.28                                  |
| 105      | 23484              | 0.159                 | 0.213                                 | 8.55                                       | 0.051                                  | 3.28                                  |
| 110      | 23518              | 0.157                 | 0.203                                 | 8.91                                       | 0.055                                  | 3.30                                  |
| 113      | 23607              | 0.159                 | 0.214                                 | 8.97                                       | 0.059                                  | 3.32                                  |
| 116      | 23676              | 0.158                 | 0.202                                 | 9.02                                       | 0.065                                  | 3.34                                  |
| 120      | 23764              | 0.158                 | 0.216                                 | 9.13                                       | 0.079                                  | 3.37                                  |
| 123      | 23884              | 0.154                 | 0.204                                 | 9.43                                       | 0.101                                  | 3.41                                  |
| 126      | 24023              | 0.158                 | 0.216                                 | 10.51                                      | 0.130                                  | 3.48                                  |
| 130      | 23407              | 0.160                 | 0.209                                 | 10.90                                      | 0.171                                  | 3.55                                  |
| 135      | 23121              | 0.157                 | 0.210                                 | 11.68                                      | 0.194                                  | 3.60                                  |
| 140      | 23021              | 0.158                 | 0.204                                 | 12.46                                      | 0.209                                  | 3.63                                  |
| 145      | 23012              | 0.163                 | 0.216                                 | 12.71                                      | 0.218                                  | 3.64                                  |
| 150      | 22999              | 0.163                 | 0.209                                 | 13.20                                      | 0.229                                  | 3.64                                  |
| 155      | 23004              | 0.167                 | 0.226                                 | 13.51                                      | 0.229                                  | 3.65                                  |
| 160      | 22993              | 0.165                 | 0.219                                 | 14.07                                      | 0.233                                  | 3.66                                  |

<sup>a</sup> R factor =  $\sum |F_o| - |F_c| / \sum |F_{obs}|$

<sup>b</sup> R<sub>free</sub> factor is calculated the same as R factor, except it uses 5 % of reflection data omitted from refinement

<sup>c</sup> Self-RMS deviation was calculated between the structure at 80 K and the structures at higher temperatures of Thau-0M-2.

<sup>d</sup> WDD peak position in d-spacing:  $d = 2\pi/Q$ , where the momentum transfer vector  $Q$  is given by  $Q = 4\pi\sin(\theta)/\lambda$ , where  $\lambda$  is the X-ray wavelength and  $2\theta$  is the angle between the incident beam and the diffracted X-rays.

**Table S5.** Data collection statistics of Thau-0.45M

| Temp (K) | Unit-cell dimensions (Å) |        | Resolution (Å)       | Mosaicity (°) | R <sub>sym</sub> <sup>a</sup> | I/σ(I)         | Completeness (%) | Redundancy |
|----------|--------------------------|--------|----------------------|---------------|-------------------------------|----------------|------------------|------------|
|          | a=b                      | c      |                      |               |                               |                |                  |            |
| 80       | 57.26                    | 149.39 | 50-1.9<br>(1.93-1.9) | 0.365         | 0.051<br>(0.124)              | 29.2 (8.8)     | 98.2 (97.3)      | 4.7 (4.2)  |
| 85       | 57.27                    | 149.42 | 50-1.9<br>(1.93-1.9) | 0.36          | 0.051<br>(0.123)              | 28.6 (8.9)     | 98.2 (97.3)      | 4.7 (4.3)  |
| 90       | 57.27                    | 149.45 | 50-1.9<br>(1.93-1.9) | 0.365         | 0.052<br>(0.117)              | 28.2 (9.2)     | 97.9 (97.4)      | 4.7 (4.2)  |
| 95       | 57.29                    | 149.49 | 50-1.9<br>(1.93-1.9) | 0.36          | 0.048<br>(0.111)              | 30.5<br>(10.0) | 98.2 (97.4)      | 4.7 (4.2)  |
| 100      | 57.31                    | 149.55 | 50-1.9<br>(1.93-1.9) | 0.36          | 0.046<br>(0.113)              | 31.6 (9.5)     | 98.1 (97.2)      | 4.7 (4.2)  |
| 105      | 57.34                    | 149.56 | 50-1.9<br>(1.93-1.9) | 0.385         | 0.050<br>(0.126)              | 31.4 (9.3)     | 98.1 (97.5)      | 4.7 (4.2)  |
| 110      | 57.38                    | 149.63 | 50-1.9<br>(1.93-1.9) | 0.39          | 0.047<br>(0.120)              | 31.9 (9.4)     | 98.2 (97.2)      | 4.7 (4.2)  |
| 115      | 57.42                    | 149.70 | 50-1.9<br>(1.93-1.9) | 0.33          | 0.046<br>(0.115)              | 31.7 (9.9)     | 98.3 (97.3)      | 4.7 (4.3)  |
| 120      | 57.48                    | 149.83 | 50-1.9<br>(1.93-1.9) | 0.31          | 0.046<br>(0.112)              | 31.7<br>(10.0) | 98.3 (97.4)      | 4.7 (4.3)  |
| 125      | 57.57                    | 150.03 | 50-1.9<br>(1.93-1.9) | 0.295         | 0.045<br>(0.109)              | 33.8<br>(11.0) | 98.4 (97.8)      | 4.7 (4.2)  |
| 130      | 57.69                    | 150.27 | 50-1.9<br>(1.93-1.9) | 0.295         | 0.046<br>(0.112)              | 34.3<br>(11.3) | 98.4 (97.7)      | 4.7 (4.3)  |
| 135      | 57.85                    | 150.55 | 50-1.9<br>(1.93-1.9) | 0.33          | 0.047<br>(0.122)              | 32.3<br>(10.1) | 98.4 (97.8)      | 4.7 (4.3)  |
| 140      | 58.01                    | 150.82 | 50-1.9<br>(1.93-1.9) | 0.375         | 0.050<br>(0.152)              | 31.3 (8.1)     | 98.4 (98.1)      | 4.7 (4.3)  |
| 145      | 58.18                    | 151.02 | 50-1.9<br>(1.93-1.9) | 0.37          | 0.052<br>(0.161)              | 30.0 (7.5)     | 98.5 (99.0)      | 4.7 (4.2)  |
| 150      | 58.30                    | 151.12 | 50-1.9<br>(1.93-1.9) | 0.4           | 0.055<br>(0.192)              | 28.8 (6.2)     | 98.6 (99.1)      | 4.7 (4.2)  |
| 155      | 58.40                    | 151.15 | 50-1.9<br>(1.93-1.9) | 0.44          | 0.058<br>(0.222)              | 26.8 (5.3)     | 98.6 (99.1)      | 4.7 (4.2)  |
| 160      | 58.48                    | 151.14 | 50-1.9<br>(1.93-1.9) | 0.47          | 0.061<br>(0.229)              | 25.6 (4.5)     | 98.6 (99.1)      | 4.7 (4.2)  |

$$^a R_{\text{sym}} = \sum |I - \langle I \rangle| / \sum \langle I \rangle$$

**Table S6.** Refinement statistics of Thau-0.45M

| Temp (K) | Unique reflections | R factor <sup>a</sup> | R <sub>free</sub> factor <sup>b</sup> | B factor (Å <sup>2</sup> ) – main chain | Self-RMS deviation <sup>c</sup> (Å) | WDD peak position (Å) <sup>d</sup> |
|----------|--------------------|-----------------------|---------------------------------------|-----------------------------------------|-------------------------------------|------------------------------------|
| 80       | 20209              | 0.162                 | 0.223                                 | 9.64                                    | 0                                   | 3.12                               |
| 85       | 20211              | 0.161                 | 0.216                                 | 9.66                                    | 0.036                               | 3.12                               |
| 90       | 20168              | 0.162                 | 0.209                                 | 9.78                                    | 0.050                               | 3.13                               |
| 95       | 20229              | 0.161                 | 0.222                                 | 10.01                                   | 0.067                               | 3.13                               |
| 100      | 20252              | 0.158                 | 0.222                                 | 9.96                                    | 0.069                               | 3.14                               |
| 105      | 20241              | 0.160                 | 0.217                                 | 9.58                                    | 0.074                               | 3.15                               |
| 110      | 20283              | 0.162                 | 0.216                                 | 10.05                                   | 0.051                               | 3.16                               |
| 115      | 20342              | 0.161                 | 0.224                                 | 9.61                                    | 0.061                               | 3.17                               |
| 120      | 20409              | 0.162                 | 0.208                                 | 9.69                                    | 0.064                               | 3.18                               |
| 125      | 20516              | 0.160                 | 0.204                                 | 9.80                                    | 0.076                               | 3.21                               |
| 130      | 20656              | 0.159                 | 0.209                                 | 9.90                                    | 0.109                               | 3.26                               |
| 135      | 20855              | 0.161                 | 0.215                                 | 10.39                                   | 0.125                               | 3.32                               |
| 140      | 21028              | 0.162                 | 0.208                                 | 11.64                                   | 0.147                               | 3.40                               |
| 145      | 21154              | 0.163                 | 0.212                                 | 12.45                                   | 0.166                               | 3.46                               |
| 150      | 21276              | 0.164                 | 0.212                                 | 13.56                                   | 0.177                               | 3.51                               |
| 155      | 21345              | 0.169                 | 0.219                                 | 14.59                                   | 0.186                               | 3.55                               |
| 160      | 21421              | 0.174                 | 0.215                                 | 15.54                                   | 0.194                               | 3.56                               |

<sup>a</sup> R factor =  $\sum |F_o| - |F_c| / \sum |F_{obs}|$

<sup>b</sup> R<sub>free</sub> factor is calculated the same as R factor, except it uses 5 % of reflection data omitted from refinement

<sup>c</sup> Self-RMS deviation was calculated between the structure at 80 K and the structures at higher temperatures of Thau-0.45M.

<sup>d</sup> WDD peak position in d-spacing:  $d = 2\pi/Q$ , where the momentum transfer vector  $Q$  is given by  $Q = 4\pi\sin(\theta)/\lambda$ , where  $\lambda$  is the X-ray wavelength and  $2\theta$  is the angle between the incident beam and the diffracted X-rays.

**Table S7.** Data collection statistics of Thau-0.9M

| Temp (K) | Unit-cell dimensions (Å) |        | Resolution (Å)       | Mosaicity (°) | R <sub>sym</sub> <sup>a</sup> | I/σ(I)         | Completeness (%) | Redundancy |
|----------|--------------------------|--------|----------------------|---------------|-------------------------------|----------------|------------------|------------|
|          | a=b                      | c      |                      |               |                               |                |                  |            |
| 80       | 57.43                    | 149.90 | 30-1.9<br>(1.97-1.9) | 0.317         | 0.029<br>(0.056)              | 49.2<br>(19.4) | 98.4 (87.0)      | 4.4 (3.1)  |
| 90       | 57.46                    | 149.98 | 30-1.9<br>(1.97-1.9) | 0.316         | 0.041<br>(0.066)              | 35.1<br>(14.0) | 98.3 (86.6)      | 4.4 (3.1)  |
| 100      | 57.51                    | 150.00 | 30-1.9<br>(1.97-1.9) | 0.302         | 0.034<br>(0.063)              | 39.9<br>(16.6) | 98.3 (86.7)      | 4.3 (3.1)  |
| 110      | 57.60                    | 150.08 | 30-1.9<br>(1.97-1.9) | 0.313         | 0.030<br>(0.057)              | 48.3<br>(18.4) | 98.2 (86.2)      | 4.4 (3.1)  |
| 120      | 57.66                    | 150.26 | 30-1.9<br>(1.97-1.9) | 0.325         | 0.029<br>(0.055)              | 48.2<br>(18.1) | 98.3 (86.8)      | 4.4 (3.1)  |
| 130      | 57.82                    | 150.53 | 30-1.9<br>(1.97-1.9) | 0.296         | 0.028<br>(0.053)              | 49.4<br>(19.2) | 98.2 (86.2)      | 4.4 (3.1)  |
| 135      | 57.97                    | 150.75 | 30-1.9<br>(1.97-1.9) | 0.262         | 0.026<br>(0.045)              | 53.1<br>(22.9) | 98.1 (85.7)      | 4.4 (3.1)  |
| 140      | 58.08                    | 150.88 | 30-1.9<br>(1.97-1.9) | 0.323         | 0.027<br>(0.046)              | 50.5<br>(21.0) | 98.1 (85.8)      | 4.4 (3.1)  |
| 145      | 58.19                    | 150.97 | 30-1.9<br>(1.97-1.9) | 0.468         | 0.027<br>(0.056)              | 50.2<br>(18.7) | 97.9 (84.7)      | 4.4 (3.1)  |
| 150      | 58.29                    | 151.02 | 30-1.9<br>(1.97-1.9) | 0.600         | 0.030<br>(0.076)              | 45.6<br>(14.6) | 98.0 (85.4)      | 4.4 (3.1)  |
| 155      | 58.38                    | 151.03 | 30-1.9<br>(1.97-1.9) | 0.722         | 0.037<br>(0.104)              | 37.8<br>(10.1) | 98.0 (85.7)      | 4.4 (3.1)  |
| 160      | 58.45                    | 151.00 | 30-1.9<br>(1.97-1.9) | 0.818         | 0.046<br>(0.129)              | 31.0 (7.3)     | 98.0 (86.2)      | 4.4 (3.1)  |

<sup>a</sup>  $R_{\text{sym}} = \frac{\sum |I - \langle I \rangle|}{\sum \langle I \rangle}$

**Table S8.** Refinement statistics of Thau-0.9M

| Temp (K) | Unique reflections | R factor <sup>a</sup> | R <sub>free</sub> factor <sup>b</sup> | B factor (Å <sup>2</sup> )<br>– main chain | Self-RMS deviation <sup>c</sup><br>(Å) | WDD peak position (Å)<br><sup>d</sup> |
|----------|--------------------|-----------------------|---------------------------------------|--------------------------------------------|----------------------------------------|---------------------------------------|
| 80       | 20343              | 0.162                 | 0.212                                 | 9.05                                       | 0                                      | 3.09                                  |
| 90       | 20347              | 0.163                 | 0.215                                 | 9.42                                       | 0.045                                  | 3.10                                  |
| 100      | 20390              | 0.161                 | 0.215                                 | 9.55                                       | 0.04                                   | 3.10                                  |
| 110      | 20455              | 0.165                 | 0.219                                 | 9.94                                       | 0.056                                  | 3.11                                  |
| 120      | 20505              | 0.161                 | 0.222                                 | 10.20                                      | 0.064                                  | 3.14                                  |
| 130      | 20646              | 0.162                 | 0.223                                 | 10.05                                      | 0.089                                  | 3.18                                  |
| 135      | 20767              | 0.163                 | 0.216                                 | 10.02                                      | 0.105                                  | 3.26                                  |
| 140      | 20843              | 0.160                 | 0.216                                 | 10.55                                      | 0.122                                  | 3.29                                  |
| 145      | 20922              | 0.165                 | 0.215                                 | 11.82                                      | 0.144                                  | 3.35                                  |
| 150      | 21003              | 0.164                 | 0.226                                 | 13.38                                      | 0.152                                  | 3.42                                  |
| 155      | 21088              | 0.169                 | 0.215                                 | 14.87                                      | 0.166                                  | 3.56                                  |
| 160      | 21150              | 0.170                 | 0.221                                 | 16.43                                      | 0.172                                  | 3.64                                  |

<sup>a</sup> R factor =  $\sum |F_o| - |F_c| / \sum |F_{obs}|$

<sup>b</sup> R<sub>free</sub> factor is calculated the same as R factor, except it uses 5 % of reflection data omitted from refinement

<sup>c</sup> Self-RMS deviation was calculated between the structure at 80 K and the structures at higher temperatures of Thau-0.9M.

<sup>d</sup> WDD peak position in d-spacing:  $d = 2\pi/Q$ , where the momentum transfer vector  $Q$  is given by  $Q = 4\pi\sin(\theta)/\lambda$ , where  $\lambda$  is the X-ray wavelength and  $2\theta$  is the angle between the incident beam and the diffracted X-rays.

**Table S9.** Data collection statistics of Thau-control

| Temp (K) | Unit-cell dimensions (Å) |        | Resolution (Å)       | Mosaicity (°) | R <sub>sym</sub> <sup>a</sup> | I/σ(I)         | Completeness (%) | Redundancy |
|----------|--------------------------|--------|----------------------|---------------|-------------------------------|----------------|------------------|------------|
|          | a=b                      | c      |                      |               |                               |                |                  |            |
| 80       | 57.76                    | 149.80 | 30-1.9<br>(1.97-1.9) | 0.377         | 0.043<br>(0.071)              | 30.9<br>(13.2) | 97.0 (92.8)      | 4.4 (2.8)  |
| 90       | 57.78                    | 149.84 | 30-1.9<br>(1.97-1.9) | 0.378         | 0.057<br>(0.077)              | 24.8<br>(11.0) | 97.1 (93.2)      | 4.4 (2.9)  |
| 100      | 57.79                    | 149.88 | 30-1.9<br>(1.97-1.9) | 0.376         | 0.044<br>(0.072)              | 29.8<br>(12.8) | 97.2 (93.1)      | 4.5 (2.9)  |
| 110      | 57.80                    | 149.92 | 30-1.9<br>(1.97-1.9) | 0.376         | 0.043<br>(0.070)              | 30.0<br>(12.9) | 97.3 (93.5)      | 4.5 (2.9)  |
| 120      | 57.81                    | 149.96 | 30-1.9<br>(1.97-1.9) | 0.374         | 0.041<br>(0.070)              | 31.0<br>(13.2) | 97.3 (93.4)      | 4.4 (2.9)  |
| 130      | 57.82                    | 150.00 | 30-1.9<br>(1.97-1.9) | 0.373         | 0.041<br>(0.071)              | 30.9<br>(13.0) | 97.3 (93.4)      | 4.4 (2.9)  |
| 135      | 57.83                    | 150.02 | 30-1.9<br>(1.97-1.9) | 0.375         | 0.041<br>(0.070)              | 30.9<br>(12.9) | 97.3 (93.3)      | 4.4 (2.9)  |
| 140      | 57.84                    | 150.05 | 30-1.9<br>(1.97-1.9) | 0.375         | 0.043<br>(0.073)              | 30.3<br>(12.2) | 97.3 (93.1)      | 4.4 (2.8)  |
| 145      | 57.85                    | 150.08 | 30-1.9<br>(1.97-1.9) | 0.376         | 0.042<br>(0.071)              | 31.2<br>(12.9) | 97.4 (93.5)      | 4.4 (2.9)  |
| 150      | 57.87                    | 150.11 | 30-1.9<br>(1.97-1.9) | 0.378         | 0.042<br>(0.071)              | 31.1<br>(12.6) | 97.4 (93.4)      | 4.4 (2.9)  |
| 155      | 57.89                    | 150.14 | 30-1.9<br>(1.97-1.9) | 0.380         | 0.042<br>(0.073)              | 30.8<br>(12.4) | 97.4 (93.6)      | 4.4 (2.9)  |
| 160      | 57.91                    | 150.19 | 30-1.9<br>(1.97-1.9) | 0.379         | 0.042<br>(0.075)              | 30.8<br>(12.0) | 97.4 (93.5)      | 4.4 (2.9)  |

<sup>a</sup> R<sub>sym</sub> =  $\sum |I - \langle I \rangle| / \sum \langle I \rangle$

**Table S10.** Refinement statistics of Thau-control

| Temp (K) | Unique reflections | R factor <sup>a</sup> | R <sub>free</sub> factor <sup>b</sup> | B factor (Å <sup>2</sup> ) – main chain | Self-RMS deviation <sup>c</sup> (Å) | WDD peak position (Å) <sup>d</sup> |
|----------|--------------------|-----------------------|---------------------------------------|-----------------------------------------|-------------------------------------|------------------------------------|
| 80       | 20434              | 0.152                 | 0.201                                 | 10.27                                   | 0                                   | 3.78                               |
| 90       | 20231              | 0.157                 | 0.200                                 | 10.35                                   | 0.038                               | 3.74                               |
| 100      | 20249              | 0.152                 | 0.202                                 | 10.45                                   | 0.038                               | 3.73                               |
| 110      | 20232              | 0.152                 | 0.200                                 | 10.48                                   | 0.037                               | 3.72                               |
| 120      | 20310              | 0.150                 | 0.211                                 | 10.55                                   | 0.041                               | 3.73                               |
| 130      | 20331              | 0.153                 | 0.192                                 | 10.68                                   | 0.044                               | 3.73                               |
| 135      | 20334              | 0.152                 | 0.196                                 | 10.83                                   | 0.044                               | 3.74                               |
| 140      | 20549              | 0.151                 | 0.194                                 | 10.97                                   | 0.047                               | 3.76                               |
| 145      | 20363              | 0.151                 | 0.193                                 | 11.02                                   | 0.049                               | 3.74                               |
| 150      | 20384              | 0.152                 | 0.202                                 | 11.00                                   | 0.052                               | 3.75                               |
| 155      | 20394              | 0.155                 | 0.201                                 | 11.22                                   | 0.055                               | 3.76                               |
| 160      | 20432              | 0.154                 | 0.197                                 | 11.22                                   | 0.058                               | 3.77                               |

<sup>a</sup> R factor =  $\sum |F_o| - |F_c| / \sum |F_{obs}|$

<sup>b</sup> R<sub>free</sub> factor is calculated the same as R factor, except it uses 5 % of reflection data omitted from refinement

<sup>c</sup> Self-RMS deviation was calculated between the structure at 80 K and the structures at higher temperatures of Thau-control.

<sup>d</sup> WDD peak position in d-spacing:  $d = 2\pi/Q$ , where the momentum transfer vector  $Q$  is given by  $Q = 4\pi\sin(\theta)/\lambda$ , where  $\lambda$  is the X-ray wavelength and  $2\theta$  is the angle between the incident beam and the diffracted X-rays.



**Table S11.** Data collection statistics of Thau-control-noGLY

| Temp (K) | Unit-cell dimensions (Å) |        | Resolution (Å)       | Mosaicity (°) | R <sub>sym</sub> <sup>a</sup> | I/σ(I)     | Completeness (%) | Redundancy |
|----------|--------------------------|--------|----------------------|---------------|-------------------------------|------------|------------------|------------|
|          | a=b                      | c      |                      |               |                               |            |                  |            |
| 80       | 57.58                    | 149.40 | 50-1.8<br>(1.83-1.8) | 0.654         | 0.105<br>(0.339)              | 15.7 (2.6) | 95.0 (97.2)      | 4.0 (3.5)  |
| 90       | 57.60                    | 149.41 | 50-1.8<br>(1.83-1.8) | 0.665         | 0.103<br>(0.347)              | 15.3 (2.5) | 95.2 (97.2)      | 4.0 (3.5)  |
| 100      | 57.61                    | 149.46 | 50-1.8<br>(1.83-1.8) | 0.655         | 0.105<br>(0.361)              | 15.2 (2.3) | 95.1 (95.3)      | 4.0 (3.4)  |
| 105      | 57.63                    | 149.49 | 50-1.8<br>(1.83-1.8) | 0.659         | 0.105<br>(0.360)              | 15.2 (2.4) | 95.0 (96.4)      | 4.0 (3.5)  |
| 110      | 57.63                    | 149.52 | 50-1.8<br>(1.83-1.8) | 0.659         | 0.106<br>(0.372)              | 15.0 (2.1) | 95.0 (95.3)      | 4.0 (3.5)  |
| 115      | 57.65                    | 149.56 | 50-1.8<br>(1.83-1.8) | 0.660         | 0.105<br>(0.362)              | 15.2 (2.4) | 95.0 (96.9)      | 4.0 (3.5)  |
| 120      | 57.67                    | 149.59 | 50-1.8<br>(1.83-1.8) | 0.661         | 0.106<br>(0.402)              | 14.6 (2.0) | 95.0 (95.8)      | 4.0 (3.4)  |
| 125      | 57.68                    | 149.61 | 50-1.8<br>(1.83-1.8) | 0.664         | 0.105<br>(0.371)              | 14.8 (2.2) | 95.0 (96.9)      | 4.0 (3.5)  |
| 128      | 57.69                    | 149.64 | 50-1.8<br>(1.83-1.8) | 0.663         | 0.105<br>(0.389)              | 14.7 (2.1) | 95.0 (95.7)      | 4.0 (3.5)  |
| 131      | 57.70                    | 149.66 | 50-1.8<br>(1.83-1.8) | 0.667         | 0.106<br>(0.402)              | 14.5 (2.0) | 95.0 (95.7)      | 4.0 (3.5)  |
| 135      | 57.71                    | 149.68 | 50-1.8<br>(1.83-1.8) | 0.666         | 0.106<br>(0.395)              | 14.4 (1.9) | 95.0 (96.0)      | 4.0 (3.5)  |
| 138      | 57.71                    | 149.69 | 50-1.8<br>(1.83-1.8) | 0.662         | 0.106<br>(0.397)              | 14.4 (1.9) | 95.0 (96.1)      | 4.0 (3.4)  |
| 141      | 57.72                    | 149.72 | 50-1.8<br>(1.83-1.8) | 0.660         | 0.106<br>(0.390)              | 14.3 (1.9) | 95.0 (96.0)      | 4.0 (3.4)  |
| 145      | 57.73                    | 149.75 | 50-1.8<br>(1.83-1.8) | 0.657         | 0.105<br>(0.401)              | 14.1 (1.9) | 95.0 (96.0)      | 4.0 (3.4)  |
| 150      | 57.75                    | 149.80 | 50-1.8<br>(1.83-1.8) | 0.654         | 0.105<br>(0.406)              | 14.0 (1.9) | 95.0 (96.2)      | 4.0-(3.5)  |
| 155      | 57.78                    | 149.86 | 50-1.8<br>(1.83-1.8) | 0.643         | 0.104<br>(0.400)              | 14.0 (1.9) | 95.1 (96.2)      | 4.0 (3.5)  |
| 160      | 57.82                    | 149.93 | 50-1.8<br>(1.83-1.8) | 0.628         | 0.102<br>(0.376)              | 14.1 (2.0) | 95.1 (96.7)      | 4.0 (3.5)  |

$$^a R_{\text{sym}} = \frac{\sum |I - \langle I \rangle|}{\sum \langle I \rangle}$$

**Table S12.** Refinement statistics of Thau-control-noGLY

| Temp (K) | Unique reflections | R factor <sup>a</sup> | R <sub>free</sub> factor <sup>b</sup> | B factor (Å <sup>2</sup> )<br>– main chain | Self-RMS deviation <sup>c</sup><br>(Å) | WDD peak position (Å)<br><sup>d</sup> |
|----------|--------------------|-----------------------|---------------------------------------|--------------------------------------------|----------------------------------------|---------------------------------------|
| 80       | 23204              | 0.169                 | 0.211                                 | 17.20                                      | 0                                      | n/a                                   |
| 90       | 23271              | 0.168                 | 0.206                                 | 17.35                                      | 0.045                                  | n/a                                   |
| 100      | 23706              | 0.169                 | 0.225                                 | 17.35                                      | 0.048                                  | n/a                                   |
| 105      | 23246              | 0.169                 | 0.209                                 | 17.45                                      | 0.047                                  | n/a                                   |
| 110      | 23637              | 0.169                 | 0.215                                 | 17.56                                      | 0.050                                  | n/a                                   |
| 115      | 23291              | 0.170                 | 0.208                                 | 17.45                                      | 0.052                                  | n/a                                   |
| 120      | 23729              | 0.172                 | 0.236                                 | 17.53                                      | 0.054                                  | n/a                                   |
| 125      | 23304              | 0.173                 | 0.220                                 | 17.54                                      | 0.057                                  | n/a                                   |
| 128      | 23679              | 0.168                 | 0.217                                 | 17.58                                      | 0.056                                  | n/a                                   |
| 131      | 23672              | 0.173                 | 0.227                                 | 17.52                                      | 0.057                                  | n/a                                   |
| 135      | 23679              | 0.168                 | 0.226                                 | 17.62                                      | 0.055                                  | n/a                                   |
| 138      | 23767              | 0.168                 | 0.224                                 | 17.64                                      | 0.063                                  | n/a                                   |
| 141      | 23779              | 0.170                 | 0.222                                 | 17.37                                      | 0.065                                  | n/a                                   |
| 145      | 23788              | 0.170                 | 0.223                                 | 17.40                                      | 0.067                                  | n/a                                   |
| 150      | 23803              | 0.168                 | 0.222                                 | 17.35                                      | 0.067                                  | n/a                                   |
| 155      | 23824              | 0.169                 | 0.222                                 | 17.13                                      | 0.071                                  | n/a                                   |
| 160      | 23484              | 0.168                 | 0.207                                 | 17.28                                      | 0.080                                  | n/a                                   |

<sup>a</sup> R factor =  $\sum |F_o| - |F_c| / \sum |F_{obs}|$

<sup>b</sup> R<sub>free</sub> factor is calculated the same as R factor, except it uses 5 % of reflection data omitted from refinement

<sup>c</sup> Self-RMS deviation was calculated between the structure at 80 K and the structures at higher temperatures of Thau-control-noGLY.

<sup>d</sup> WDD peak position in d-spacing:  $d = 2\pi/Q$ , where the momentum transfer vector  $Q$  is given by  $Q = 4\pi\sin(\theta)/\lambda$ , where  $\lambda$  is the X-ray wavelength and  $2\theta$  is the angle between the incident beam and the diffracted X-rays.
